# Supplementary material for: Nω-(Carboxymethyl)arginine Is One of the Dominant Advanced Glycation End Products in Glycated Collagens and Mouse Tissues
Source: PubMed Central journal article supplement (PMC6754957; doi:10.1155/2019/9073451), 2019-09-10
Supplement: 9073451.f1.pdf [file 9073451.f1.pdf]

## Supplementary Information

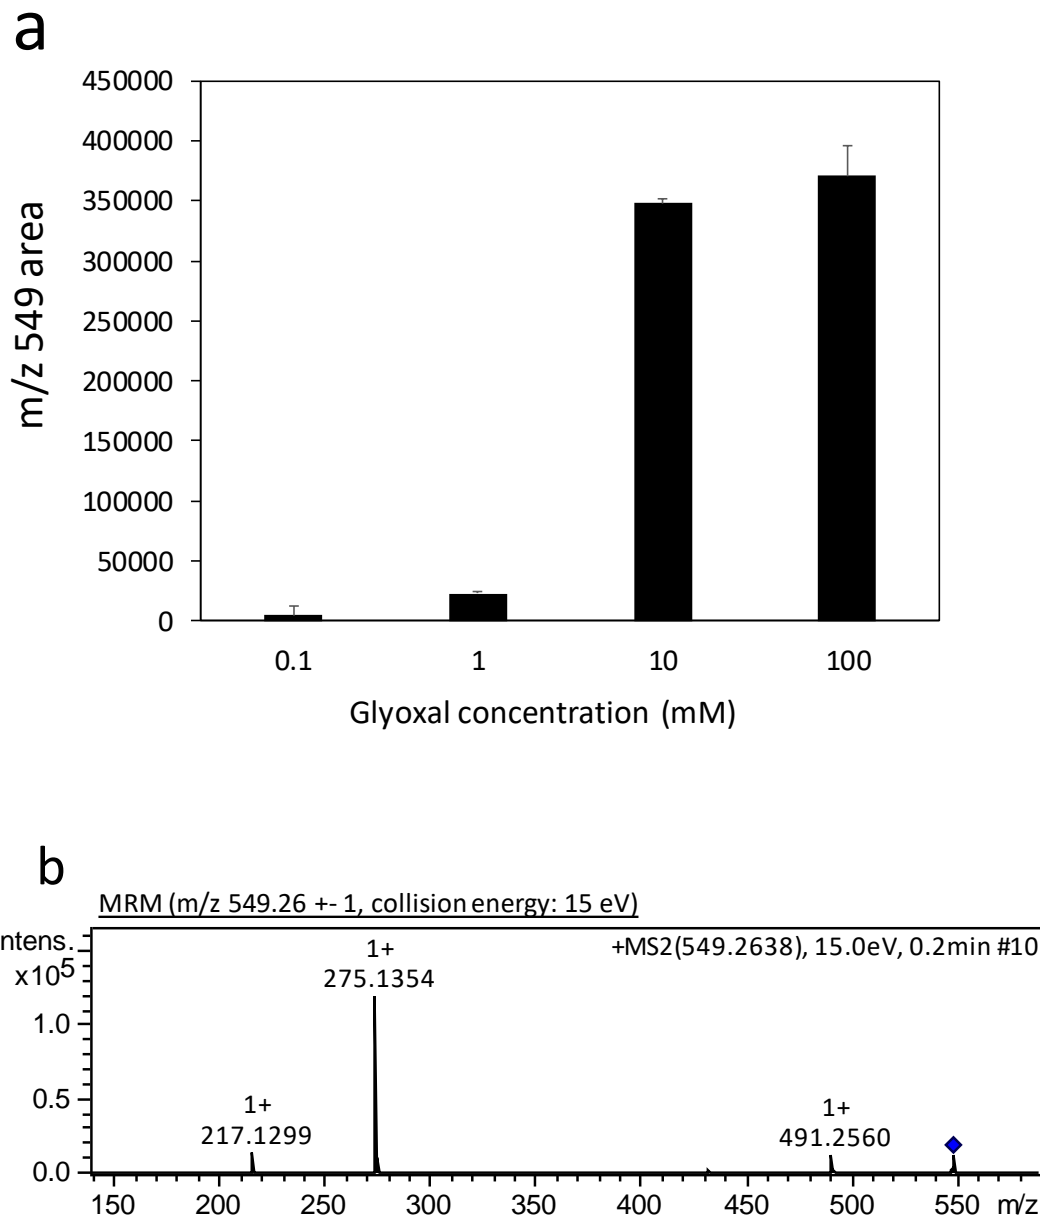

Formation of arginine adduct with high concentration of glyoxal. (a) The incubation of *N*<sup>α</sup>-acetyl-L-arginine with high concentrations of glyoxal (above 10 mM) generated parent ion of  $549.2637 \pm 0.005$  (*m/z*) with elemental composition of C<sub>20</sub>H<sub>37</sub>N<sub>8</sub>O<sub>10</sub> that possesses two CMA molecules (CMA dimer). N=3. (b) Fragment ions of CMA dimer:  $491.2560 \pm 0.005$  (*m/z*) for de-acetylated CMA dimer,  $275.1354 \pm 0.005$  (*m/z*) for *N*<sup>α</sup>-acetyl-CMA, and  $217.1299 \pm 0.005$  (*m/z*) for *N*<sup>α</sup>-acetyl-L-arginine.
